# Supplementary material for: Cardiovascular risk management after reproductive and pregnancy-related disorders: A Dutch multidisciplinary evidence-based guideline
Source: Oxford University Press journal article supplement (doi:10.1177/2047487316659573), 2016-07-19
Supplement: suppl-material.pdf [file suppl-material.pdf]

## ONLINE SUPPLEMENT

# CARDIOVASCULAR RISK MANAGEMENT AFTER REPRODUCTIVE AND PREGNANCY RELATED DISORDERS: A DUTCH MULTIDISCIPLINARY EVIDENCE-BASED GUIDELINE

Karst Y. Heida<sup>1,2</sup>, Michiel L. Bots<sup>2</sup>, Christianne J.M. de Groot<sup>3</sup>, Frederique M. van Dunné<sup>4</sup>, Nurah M. Hammoud<sup>1</sup>, Annemiek Hoek<sup>5</sup>, Joop S.E. Laven<sup>6</sup>, Angela H.E.M. Maas<sup>7</sup>, Jeanine E. Roeters van Lennep<sup>8</sup>, Birgitta K. Velthuis<sup>9</sup>, Arie Franx (Chair)<sup>1</sup>

1 Division of Woman and Baby, University Medical Center Utrecht, Utrecht, The Netherlands. 2 Julius Center for Health Sciences and Primary Care, University Medical Center Utrecht, Utrecht, The Netherlands. 3 Department of Obstetrics and Gynaecology, Medical Center, VU University, Amsterdam, The Netherlands. 4 Department of Obstetrics and Gynaecology, Medical Center Haaglanden. The Hague, The Netherlands. 5 Department of Obstetrics and Gynaecology, Section Reproductive Medicine, University Medical Center, Groningen, University of Groningen, The Netherlands. 6 Division of Reproductive Medicine, Department of Obstetrics and Gynecology, Erasmus MC University Medical Center, Rotterdam, The Netherlands. 7 Department of Cardiology, Radboud University Medical Center, Nijmegen, The Netherlands. 8 Department of Internal Medicine, Erasmus MC, Rotterdam the Netherlands. 9 Department of Radiology, University Medical Center Utrecht, Utrecht, The Netherlands.

Corresponding author: Arie Franx, Department of Obstetrics, Division Woman and Baby, UMC Utrecht, PO Box: 85090, 3508 AB Utrecht, The Netherlands, Phone: +31 (0)88 7556426, Fax: +31 (0)88 7555320. Email: A.Franx-2@umcutrecht.nl

This work was presented at the European Congress of the International Society for the Study of Hypertension in Pregnancy (ISSHP), September 24-26 2015, Budapest, Hungary.

**Sources of support:** This guideline was funded by a grant of the quality fund (SKMS) from the Dutch Society of Medical Specialists.

**CONTENT ONLINE SUPPLEMENT**

**Section 1. Methods.....3**

**Section 2. Search strategies for the reproductive or pregnancy related disorders and the risk of developing a cardiovascular event or risk factor. ....6**

**Table S1. Grading system for level of evidence used at the Dutch Institute for Healthcare Improvement CBO..... 20**

**Table S2. Results from meta-analysis of studies assessing the relation between preeclampsia and cardiovascular disease and risk factors ..... 22**

**Table S3. Results from meta-analysis of studies assessing the relation between gestational hypertension and cardiovascular disease and risk factors ..... 23**

**Section S3. Summary of the Dutch guideline for cardiovascular management ..... 24**

**Table S4. Results from meta-analysis of studies assessing the relation between spontaneous preterm delivery and cardiovascular disease and risk factors ..... 29**

**Table S5. Results from meta-analysis of studies assessing the relation between a history of a small-for-gestational-age infant and cardiovascular disease and risk factors ..... 30**

**Table S6. Results from meta-analysis of studies assessing the relation between a history of recurrent miscarriage and cardiovascular disease and risk factors..... 31**

**Table S7. Results from meta-analysis of studies assessing the relation between polycystic ovary syndrome and cardiovascular disease and risk factors..... 32**

**Table S8. Results from meta-analysis of studies assessing the relation between premature ovarian insufficiency and cardiovascular disease and risk factors..... 33**

**Section S4. Identified knowledge gaps ..... 34**

**Table S9. Summary of guidelines addressing postpartum CVD prevention after reproductive and pregnancy related disorders ..... 35**

**References..... 37**

## **Section 1. Methods**

Five gynecologists, one cardiologist, one vascular internist, one radiologist, one general practitioner and two epidemiologists participated in the guideline development group. All were authorized by their scientific professional association (the Dutch Society of Obstetrics and Gynecology, The Netherlands Society of Cardiology, The Netherlands Society of Internal Medicine, the Radiological Society of The Netherlands and the Dutch College of General Practitioners, respectively).

The guideline was developed consistent with the “Appraisal of Guidelines for Research and Evaluation” instrument,<sup>1</sup> an approach that is currently used in the development of guidelines in The Netherlands by the Dutch Institute for Healthcare improvement (Centraal BegeleidingsOrgaan, CBO, <http://www.cbo.nl/en>). Initially, the development group performed a problem analysis to define the scope and relevant topics for this guideline. An invitational conference was organized with different stakeholders involved in the care of patients with reproductive and pregnancy related disorders, such as health insurers, the Health Care Inspectorate (Inspectie voor de Gezondheidszorg, IGZ, <http://www.igz.nl/english/>), patients associations (Stichting HELLP-syndroom, <http://www.hellp.nl>) and the National Health Care Institute (Zorginstituut Nederland, <https://www.zorginstituutnederland.nl>). Furthermore, three focus groups were organized to allow women with either a reproductive disorder or a history of pregnancy related disorder to inform the development group about their experiences with the provided care, as well as their needs and desires to improve current healthcare.

These obtained problem topics were translated into the following clinical key question: what is the relative risk of a cardiovascular event and what is the relative risk of having or developing a cardiovascular risk factor after a reproductive or pregnancy related

disorder? The scientific literature was systematically searched for answering these questions using the electronic databases MEDLINE and EMBASE. Separate search strategies were developed for each reproductive or pregnancy related disorder, however the same outcome measures were used in all searches, for details see Section S2. Systematic searches were conducted in collaboration with an information specialist. Studies were limited to English language. Members of the development group were allocated to clinical topics. To select relevant literature two members of the development group reviewed results of the search for each clinical topic. Discrepancies were discussed with inclusion of a third reviewer if necessary. Furthermore, the bibliographies references of relevant literature were hand-searched for other valuable references. The characteristics and methodological quality of the studies were assessed using the checklists from the Dutch Cochrane Center.<sup>2</sup> The evidence was summarized in evidence tables and in the guideline text. The relation between the reproductive or pregnancy related disorders and CVD risk and risk factors was defined and assessed by meta-analysis. If multiple published reports from the same study were available, we included the one with the largest cohort and most detailed information for both exposure and outcome. Relative risks (RR), odds ratios (OR) and hazard ratios (HR) with their 95% confidence intervals (CI) were extracted from the selected publications. When available, the results of the most complete multivariate models with adjustment for potential confounders was used. The inverse variance weighted method was used to combine the most adjusted ratios to produce a pooled RR and 95% CI. The pooled RR was estimate using a random effect's model. All statistical analysis were performed using Review Manager 5.2.

In the guideline, each pregnancy or reproductive disorder has its own section that comprises background, a summary of the literature, meta-analysis with the level of

evidence, considerations and recommendations. The grading tool of the Dutch Institute for Healthcare improvement (CBO) was used to level the evidence, see Table S1.

Conclusions and recommendations were based predominantly on the result of cohort studies, since these provide the best information about the causation of disease and are less prone to bias. The recommendations are the practical answer to the key question: what is the relative risk of a cardiovascular event and what is the relative risk of having or developing a cardiovascular risk factor after a reproductive or pregnancy related disorder? They were based on the evidence and balanced with the knowledge and experience of the development group members. The guideline ends with a general discussion. The identified knowledge gaps can be found in Section S4. The guideline was reviewed by all participating scientific societies in order to achieve consensus on statements including issues concerning organization of care.

**Section 2. Search strategies for the reproductive or pregnancy related disorders and the risk of developing a cardiovascular event or risk factor.**

**Hypertensive disorders of pregnancy**

*Medline (OVID) – 1966 to 23 January 2013*

- 5 exp Hypertension, Pregnancy-Induced/ (25741)
- 6 ((pregnancy-induced or gestational or maternal) adj3 hypertension\*).ti. (1547)
- 7 ((transient adj3 hypertension) and pregnan\*).ti. (10)
- 8 ("hemolysis, elevated liver enzymes, and low platelet\*" or hellp or eclampsia or pre-eclampsia or preeclampsia or (pregnancy adj3 toxemia)).ti. (11855)
- 9 or/5-8 (27132)
- 10 exp Cardiovascular Diseases/ep, et [Epidemiology, Etiology] (439592)
- 11 (exp Renal Insufficiency/ or calcinosis/ or exp vascular calcification/ or Hypercholesterolemia/ or exp Obesity/ or exp Electrocardiography/ or exp Hypertension/ or exp Diabetes Mellitus/ or Metabolic Syndrome X/) and (epidemiology or etiology).fs. (276102)
- 12 (stroke or CVA or cerebrovascular or cardiovascul\* or (myocard\* adj2 infarct\*) or atheroscleros\* or "vascular calcification\*" or ((renal or kidney) adj3 (insufficienc\* or failure\*)) or "ischaemic attack\*" or TIA or "angina pectoris" or electrocardiogra\* or ecg or hypercholesterolemia or hypertension or diabet\* or ((endothelial or vascular) adj2

dysfunction\*) or (("left ventricular" or myocardial) adj3 hypertroph\*) or (metabol\* adj2 syndrome\*).ti. (630214)

13 10 or 11 or 12 (1048086)

14 9 and 13 (5425)

15 limit 14 to english language (4061) -

16 (meta-analysis/ or meta-analysis as topic/ or (meta adj analy\$).tw. or (systematic\* adj review\$1).tw. or (systematic adj overview\$1).tw. or exp "Review Literature as Topic"/ or cochrane.ab. or cochrane.jw. or embase.ab. or medline.ab. or (psychlit or psychlit).ab. or (cinahl or cinhal).ab. or cancerlit.ab. or ((selection criteria or data extraction).ab. and "review"/)) not (Comment/ or Editorial/ or Letter/ or (animals/ not humans/)) (117463)

18 15 and 16 (57) – (SR) – keyword in reference manager: Medline-Cardio-Hypertensie-SR-23-01-2013

19 15 not 18 (3994)

*Embase (Elsevier) - 1980 to 23 January 2013*

('maternal hypertension'/exp/mj OR ((transient NEAR/3 hypertension):ti AND pregnan\*:ab,ti) OR (('pregnancy induced' OR gestational OR maternal) NEAR/3 hypertension\*):ti OR hellp:ti OR eclampsia:ti OR 'pre eclampsia':ti OR preeclampsia:ti OR (pregnancy NEAR/3 toxemia):ti OR 'haemolysis, elevated liver enzymes, and low platelet':ti OR 'haemolysis, elevated liver enzymes, and low platelets':ti OR 'hemolysis,

elevated liver enzymes, and low platelet':ti OR 'hemolysis, elevated liver enzymes, and low platelets':ti)

AND ('cardiovascular disease'/exp/mj OR 'kidney failure'/exp/mj OR 'diabetes mellitus'/exp/mj OR 'electrocardiography'/exp/mj OR 'hypercholesterolemia'/exp/mj OR 'hypertension'/exp/mj OR 'obesity'/exp/mj OR 'blood vessel calcification'/exp/mj OR 'metabolic syndrome x'/exp/mj OR stroke:ab,ti OR cva:ab,ti OR cerebrovascular:ab,ti OR cardiovascul\*:ab,ti OR (myocard\* NEAR/2 infarct\*):ab,ti OR atheroscleros\*:ab,ti OR (vascular NEAR/2 calcification):ab,ti OR ((renal OR kidney) NEAR/3 (insufficienc\* OR failure\*)):ab,ti OR (ischaemic NEAR/2 attack\*):ab,ti OR tia:ab,ti OR 'angina pectoris':ab,ti OR electrocardiogra\*:ab,ti OR ecg:ab,ti OR hypercholesterolemia:ab,ti OR obesity:ab,ti OR hypertension:ab,ti OR diabet\*:ab,ti OR ((endothelial OR vascular) NEAR/2 dysfunction\*):ab,ti OR (('left ventricular' OR myocardial) NEAR/3 hypertroph\*):ab,ti OR (metabol\* NEAR/2 syndrome\*):ab,ti)

NOT 'conference abstract':it AND [english]/lim AND [embase]/lim

## **Preterm delivery**

*Medline (OVID) – 1966 to 17 July 2014*

- 1 Obstetric Labor, Premature
- 2 ((preterm or premature) adj3 (birth\* or deliver\*)):ti,ab.
- 3 1 or 2
- 4 exp Cardiovascular Diseases



5 exp Renal Insufficiency/ or calcinosis/ or exp vascular calcification/ or  
Hypercholesterolemia/ or exp Obesity/ or exp Electrocardiography/ or exp  
Hypertension/ or exp Proteinuria/ or exp Diabetes Mellitus/ or Metabolic Syndrome X

6 (stroke or CVA or cerebrovascular or cardiovascul\* or (myocard\* adj2 infarct\*) or  
atheroscleros\* or "vascular calcification\*" or ((renal or kidney) adj3 (insufficienc\* or  
failure\*)) or "ischaemic attack\*" or TIA or "angina pectoris" or electrocardiogra\* or ecg  
or hypercholesterolemia or obesity or hypertension or proteinuria or diabet\* or  
((endothelial or vascular) adj2 dysfunction\*) or (("left ventricular" or myocardial) adj3  
hypertroph\*) or (metabol\* adj2 syndrome\*)).ti,ab.

7 4 or 5 or 6

8 3 and 7

13 limit 8 to english language

16 mothers/ or (maternal adj6 (cardiovascular or risk\*)).ti,ab.

17 13 and 16

22 (preterm and cardiovascular).ti.

23 8 and 22

24 17 or 23 (337)

*Embase (Elsevier) - 1980 to 17 July 2014*

('premature labor'/exp/mj OR ((preterm OR premature) NEAR/3 (birth\* OR deliver\*)):ab,ti) AND ((maternal NEAR/6 (cardiovascular OR risk\*)):ab,ti OR 'mother'/exp)

AND ('cardiovascular disease'/exp/mj OR 'kidney failure'/exp/mj OR 'diabetes mellitus'/exp/mj OR 'electrocardiography'/exp/mj OR 'hypercholesterolemia'/exp/mj OR 'hypertension'/exp/mj OR 'obesity'/exp/mj OR 'proteinuria'/exp/mj OR 'blood vessel calcification'/exp/mj OR 'metabolic syndrome x'/exp/mj OR stroke:ab,ti OR cva:ab,ti OR cerebrovascular:ab,ti OR cardiovascul\*:ab,ti OR (myocard\* NEAR/2 infarct\*):ab,ti OR atheroscleros\*:ab,ti OR (vascular NEAR/2 calcification):ab,ti OR ((renal OR kidney) NEAR/3 (insufficienc\* OR failure\*)):ab,ti OR (ischaemic NEAR/2 attack\*):ab,ti OR tia:ab,ti OR 'angina pectoris':ab,ti OR electrocardiogra\*:ab,ti OR ecg:ab,ti OR hypercholesterolemia:ab,ti OR obesity:ab,ti OR hypertension:ab,ti OR proteinuria:ab,ti OR diabet\*:ab,ti OR ((endothelial OR vascular) NEAR/2 dysfunction\*):ab,ti OR (('left ventricular' OR myocardial) NEAR/3 hypertroph\*):ab,ti OR (metabol\* NEAR/2 syndrome\*):ab,ti)

AND [english]/lim AND [embase]/lim NOT 'conference abstract':it

### **Small for gestational age infant**

*Medline (OVID) – 1966 to 19 December 2012*

- 1 ("small for gestational age" or SGA or ("intrauterine growth" adj3 (restriction or retardation)) or ("fetal growth" adj3 (restriction or retardation)) or IUGR).ti,ab. or Fetal Growth Retardation/ or infant, small for gestational age/ (23549)
- 2 exp Cardiovascular Diseases/ (1781176)
- 3 exp Renal Insufficiency/ or calcinosis/ or exp vascular calcification/ or Hypercholesterolemia/ or exp Obesity/ or exp Electrocardiography/ or exp Hypertension/ or exp Proteinuria/ or exp Diabetes Mellitus/ or Metabolic Syndrome X/ (908008)
- 4 (stroke or CVA or cerebrovascular or cardiovascul\* or (myocard\* adj2 infarct\*) or atheroscleros\* or "vascular calcification\*" or ((renal or kidney) adj3 (insufficienc\* or failure\*)) or "ischaemic attack\*" or TIA or "angina pectoris" or electrocardiogra\* or ecg or hypercholesterolemia or obesity or hypertension or proteinuria or diabet\* or ((endothelial or vascular) adj2 dysfunction\*) or (("left ventricular" or myocardial) adj3 hypertroph\*) or (metabol\* adj2 syndrome\*)).ti,ab. (1292793)
- 5 2 or 3 or 4 (2620184)
- 6 1 and 5 (6023)
- 7 (Birth characteristics and subsequent risks of maternal cardiovascular disease: effects of gestational age and fetal growth).m\_titl. (1)
- 8 "Maternal cardiovascular disease risk in relation to the number of offspring born small for gestational age: national, multi-generational study of 2.7 million births".m\_titl. (1)
- 9 7 or 8 (2)

- 10 6 and 9 (2)
- 11 limit 10 to english language (2)
- 12 limit 6 to english language (5277)
- 13 mothers/ or maternal.ti. or (maternal adj6 risk\*).ti,ab. (74353)
- 14 12 and 13 (714)
- 17 mothers/ or (maternal adj6 (cardiovascular or risk\*)).ti,ab. (32045)
- 18 12 and 17 (295)

*Embase (Elsevier) - 1980 to 19 December 2012*

('intrauterine growth retardation'/exp/mj OR 'small for date infant'/exp/mj) AND ('small for gestational age':ab,ti OR sga:ab,ti OR ('intrauterine growth' NEAR/3 (restriction OR retardation)):ab,ti OR ('fetal growth' NEAR/3 (restriction OR retardation)):ab,ti OR iugr:ab,ti) AND ('mother'/exp OR (maternal NEAR/6 (cardiovascular OR risk\*)):ab,ti)

AND ('cardiovascular disease'/exp/mj OR 'kidney failure'/exp/mj OR 'diabetes mellitus'/exp/mj OR 'electrocardiography'/exp/mj OR 'hypercholesterolemia'/exp/mj OR 'hypertension'/exp/mj OR 'obesity'/exp/mj OR 'proteinuria'/exp/mj OR 'blood vessel calcification'/exp/mj OR 'metabolic syndrome x'/exp/mj OR stroke:ab,ti OR cva:ab,ti OR cerebrovascular:ab,ti OR cardiovascul\*:ab,ti OR (myocard\* NEAR/2 infarct\*):ab,ti OR atheroscleros\*:ab,ti OR (vascular NEAR/2 calcification):ab,ti OR ((renal OR kidney) NEAR/3 (insufficienc\* OR failure\*)):ab,ti OR (ischaemic NEAR/2

attack\*):ab,ti OR tia:ab,ti OR 'angina pectoris':ab,ti OR electrocardiogra\*:ab,ti OR  
ecg:ab,ti OR hypercholesterolemia:ab,ti OR obesity:ab,ti OR hypertension:ab,ti OR  
proteinuria:ab,ti OR diabet\*:ab,ti OR ((endothelial OR vascular) NEAR/2  
dysfunction\*):ab,ti OR (('left ventricular' OR myocardial) NEAR/3 hypertroph\*):ab,ti OR  
(metabol\* NEAR/2 syndrome\*):ab,ti)  
  
AND [english]/lim AND [embase]/lim,

### **Recurrent miscarriage**

*Medline (OVID) – 1966 to 19 December 2012*

- 1 exp abortion, habitual/ (6296)
- 2 ((recurren\* or habitual) adj3 (miscarriage\* or abortion\* or "pregnancy loss\*")).ti,ab.  
(4616)
- 3 Abortion, Spontaneous/ (13738)
- 4 Recurrence/ (151907)
- 5 3 and 4 (204)
- 6 1 or 2 or 5 (7921)
- 7 exp Cardiovascular Diseases/ (1780857)
- 8 exp Renal Insufficiency/ or calcinosis/ or exp vascular calcification/ or  
Hypercholesterolemia/ or exp Obesity/ or exp Electrocardiography/ or exp  
Hypertension/ or exp Proteinuria/ or exp Diabetes Mellitus/ or Metabolic Syndrome X/  
(907743)

9 (stroke or CVA or cerebrovascular or cardiovascul\* or (myocard\* adj2 infarct\*) or atheroscleros\* or "vascular calcification\*" or ((renal or kidney) adj3 (insufficienc\* or failure\*)) or "ischaemic attack\*" or TIA or "angina pectoris" or electrocardiogra\* or ecg or hypercholesterolemia or obesity or hypertension or proteinuria or diabet\* or ((endothelial or vascular) adj2 dysfunction\*) or (("left ventricular" or myocardial) adj3 hypertroph\*) or (metabol\* adj2 syndrome\*)).ti,ab. (1292223)

10 7 or 8 or 9 (2619398)

11 6 and 10 (846)

12 limit 11 to english language (674)

17 12 not (animals/ not humans/) (670)

18 (mouse or mice or cat? or rat? or dog? or cow or horse?).ti. (1325374)

19 17 not 18 (667)

20 (meta-analysis/ or meta-analysis as topic/ or (meta adj analy\$).tw. or (systematic\* adj review\$1).tw. or (systematic adj overview\$1).tw. or exp "Review Literature as Topic"/ or cochrane.ab. or cochrane.jw. or embase.ab. or medline.ab. or (psychlit or psyclit).ab. or (cinahl or cinhal).ab. or cancerlit.ab. or ((selection criteria or data extraction).ab. and "review"/)) not (Comment/ or Editorial/ or Letter/ or (animals/ not humans/)) (121431)

21 19 and 20 (14)

22 17 not 21 (656)

*Embase (Elsevier) - 1980 to 19 December 2012*

('recurrent abortion'/exp/mj OR ((recurren\* OR habitual) NEAR/3 (miscarriage\* OR abortion\* OR 'pregnancy loss' OR 'pregnancy losses')):ab,ti OR ('spontaneous abortion'/exp/mj AND 'recurrent disease'/exp))

AND (cardiovascular disease'/exp/mj OR 'kidney failure'/exp/mj OR 'diabetes mellitus'/exp/mj OR 'electrocardiography'/exp/mj OR 'hypercholesterolemia'/exp/mj OR 'hypertension'/exp/mj OR 'obesity'/exp/mj OR 'proteinuria'/exp/mj OR 'blood vessel calcification'/exp/mj OR 'metabolic syndrome x'/exp/mj OR stroke:ab,ti OR cva:ab,ti OR cerebrovascular:ab,ti OR cardiovascul\*:ab,ti OR (myocard\* NEAR/2 infarct\*):ab,ti OR atheroscleros\*:ab,ti OR (vascular NEAR/2 calcification):ab,ti OR ((renal OR kidney) NEAR/3 (insufficienc\* OR failure\*)):ab,ti OR (ischaemic NEAR/2 attack\*):ab,ti OR tia:ab,ti OR 'angina pectoris':ab,ti OR electrocardiogra\*:ab,ti OR ecg:ab,ti OR hypercholesterolemia:ab,ti OR obesity:ab,ti OR hypertension:ab,ti OR proteinuria:ab,ti OR diabet\*:ab,ti OR ((endothelial OR vascular) NEAR/2 dysfunction\*):ab,ti OR (('left ventricular' OR myocardial) NEAR/3 hypertroph\*):ab,ti OR (metabol\* NEAR/2 syndrome\*):ab,ti)

AND [english]/lim AND [embase]/lim ' not conference abstract':it

## **Polycystic ovary syndrome**

*Medline (OVID) - 1966 to 23 December 2012*

1 Polycystic Ovary Syndrome/ (9485)

- 2 ((("stein-leventhal syndrome" or "Polycystic Ovar\*") adj3 (Syndrome\* or disease\*)) or PCOS).ti,ab. (9318)
- 3 1 or 2 (11469)
- 9 exp Cardiovascular Diseases/ (1774139)
- 10 exp Renal Insufficiency/ or calcinosis/ or exp vascular calcification/ or Hypercholesterolemia/ or exp Obesity/ or exp Electrocardiography/ or exp Hypertension/ or exp Proteinuria/ or exp Diabetes Mellitus/ or Metabolic Syndrome X/ (904001)
- 11 (stroke or CVA or cerebrovascular or cardiovascul\* or (myocard\* adj2 infarct\*) or atheroscleros\* or "vascular calcification\*" or ((renal or kidney) adj3 (insufficienc\* or failure\*)) or "ischaemic attack\*" or TIA or "angina pectoris" or electrocardiogra\* or ecg or hypercholesterolemia or hypertension or proteinuria or diabet\* or ((endothelial or vascular) adj2 dysfunction\*) or (("left ventricular" or myocardial) adj3 hypertroph\*) or (metabol\* adj2 syndrome\*)).ti. (642987)
- 12 9 or 10 or 11 (2334775)
- 13 3 and 12 (2488)
- 14 limit 13 to english language (2213)
- 15 (meta-analysis/ or meta-analysis as topic/ or (meta adj analy).tw. or (systematic\* adj review\$1).tw. or (systematic adj overview1).tw. or exp "Review Literature as Topic"/ or cochrane.ab. or cochrane.jw. or embase.ab. or medline.ab. or (psychlit or psyclit).ab. or (cinahl or cinhal).ab. or cancerlit.ab. or ((selection criteria or data



extraction).ab. and "review"/)) not (Comment/ or Editorial/ or Letter/ or (animals/ not humans/)) (120628)

16 14 and 15 (53)

*Embase (Elsevier) - 1980 to 23 December 2012*

('ovary polycystic disease'/exp/mj OR 'stein-leventhal syndrome':ab,ti OR ('polycystic ovary' NEAR/3 (syndrome\* OR disease\*)):ab,ti OR pcos:ab,ti OR 'stein-leventhal syndromes':ab,ti OR ('polycystic ovarian' NEAR/3 (syndrome\* OR disease\*)):ab,ti)

AND ('cardiovascular disease'/exp/mj OR 'kidney failure'/exp/mj OR 'diabetes mellitus'/exp/mj OR 'electrocardiography'/exp/mj OR 'hypercholesterolemia'/exp/mj OR 'hypertension'/exp/mj OR 'obesity'/exp/mj OR 'proteinuria'/exp/mj OR 'blood vessel calcification'/exp/mj OR 'metabolic syndrome x'/exp/mj OR stroke:ab,ti OR cva:ab,ti OR cerebrovascular:ab,ti OR cardiovascul\*:ab,ti OR (myocard\* NEAR/2 infarct\*):ab,ti OR atheroscleros\*:ab,ti OR (vascular NEAR/2 calcification):ab,ti OR ((renal OR kidney) NEAR/3 (insufficienc\* OR failure\*)):ab,ti OR (ischaemic NEAR/2 attack\*):ab,ti OR tia:ab,ti OR 'angina pectoris':ab,ti OR electrocardiogra\*:ab,ti OR ecg:ab,ti OR hypercholesterolemia:ab,ti OR hypertension:ab,ti OR proteinuria:ab,ti OR diabet\*:ab,ti OR ((endothelial OR vascular) NEAR/2 dysfunction\*):ab,ti OR (('left ventricular' OR myocardial) NEAR/3 hypertroph\*):ab,ti OR (metabol\* NEAR/2 syndrome\*):ab,ti)

AND [english]/lim AND [embase]/lim

## **Premature ovarian insufficiency**

*Medline (OVID) – 1966 to 9 November 2012*

1 Primary Ovarian Insufficiency/ or Menopause, Premature/ or ((premature or primary) adj2 ovarian adj2 (failure or insufficiency)).ti,ab. or ((premature or early) adj3 menopause).ti,ab.

2 exp Cardiovascular Diseases/

3 exp Renal Insufficiency/ or calcinosis/ or exp vascular calcification/ or Hypercholesterolemia/ or exp Obesity/ or exp Electrocardiography/ or exp Hypertension/ or exp Proteinuria/ or exp Diabetes Mellitus/ or Metabolic Syndrome X/

4 (stroke or CVA or cerebrovascular or cardiovascul\* or (myocard\* adj2 infarct\*) or atheroscleros\* or "vascular calcification\*" or ((renal or kidney) adj3 (insufficienc\* or failure\*)) or "ischaemic attack\*" or TIA or "angina pectoris" or electrocardiogra\* or ecg or hypercholesterolemia or obesity or hypertension or proteinuria or diabet\* or ((endothelial or vascular) adj2 dysfunction\*) or (("left ventricular" or myocardial) adj3 hypertroph\*) or (metabol\* adj2 syndrome\*)).ti,ab.

5 2 or 3 or 4

6 1 and 5

7 limit 6 to english language – (437)

*Embase (Elsevier) - 1980 to 9 November 2012*

('early menopause'/exp/mj OR 'premature ovarian failure'/exp/mj OR ((premature OR primary) NEAR/2 ('ovarian failure' OR 'ovarian insufficiency')):ab,ti OR ((premature OR early) NEAR/3 menopause):ab,ti)

AND ('cardiovascular disease'/exp/mj OR 'kidney failure'/exp/mj OR 'diabetes mellitus'/exp/mj OR 'electrocardiography'/exp/mj OR 'hypercholesterolemia'/exp/mj OR 'hypertension'/exp/mj OR 'obesity'/exp/mj OR 'proteinuria'/exp/mj OR 'blood vessel calcification'/exp/mj OR 'metabolic syndrome x'/exp/mj OR stroke:ab,ti OR cva:ab,ti OR cerebrovascular:ab,ti OR cardiovascul\*:ab,ti OR (myocard\* NEAR/2 infarct\*):ab,ti OR atheroscleros\*:ab,ti OR (vascular NEAR/2 calcification):ab,ti OR ((renal OR kidney) NEAR/3 (insufficienc\* OR failure\*)):ab,ti OR (ischaemic NEAR/2 attack\*):ab,ti OR tia:ab,ti OR 'angina pectoris':ab,ti OR electrocardiogra\*:ab,ti OR ecg:ab,ti OR hypercholesterolemia:ab,ti OR obesity:ab,ti OR hypertension:ab,ti OR proteinuria:ab,ti OR diabet\*:ab,ti OR ((endothelial OR vascular) NEAR/2 dysfunction\*):ab,ti OR (('left ventricular' OR myocardial) NEAR/3 hypertroph\*):ab,ti OR (metabol\* NEAR/2 syndrome\*):ab,ti AND ('early menopause'/exp/mj OR 'premature ovarian failure'/exp/mj OR ((premature OR primary) NEAR/2 ('ovarian failure' OR 'ovarian insufficiency')):ab,ti OR ((premature OR early) NEAR/3 menopause):ab,ti)

AND [english]/lim AND [embase]/lim

**Table S1. Grading system for level of evidence used at the Dutch Institute for Healthcare Improvement CBO**

| <b>Level</b> | <b>Studies on therapy/prevention</b>                                                                             | <b>Studies on diagnostic accuracy</b>                                                                                                                                                                                                      | <b>Studies on harm, etiology or prognosis</b>                                                                        |
|--------------|------------------------------------------------------------------------------------------------------------------|--------------------------------------------------------------------------------------------------------------------------------------------------------------------------------------------------------------------------------------------|----------------------------------------------------------------------------------------------------------------------|
| A1           | Systematic review/meta-analysis of at least two independent studies of A2 level with consistent results          |                                                                                                                                                                                                                                            |                                                                                                                      |
| A2           | Double-blind randomized controlled trial of good quality and sufficient power                                    | Study with respect to a reference test (gold standard) with pre-defined cut-off values, among large series consecutive persons that received both the index and the reference test and adequate blinding of interpretation of test results | Prospective cohort study of sufficient power and follow-up, adequate control for confounding and selective follow up |
| B            | Randomized controlled trial of modest quality or insufficient power, or other analytic study (e.g., case-control | A comparison with a reference standard that does not meet the criteria required for level A2 evidence                                                                                                                                      | Prospective cohort study that does not meet the criteria required for level A2 evidence. Or                          |

study, cohort study)

retrospective cohort  
study or case-control  
study

C Non-analytic study

D Expert opinion

---

**Level Conclusion based on**

---

1 One systematic review (A1) or at least two independent randomized controlled trials of level A2

2 One study of level A2 or at least 2 independent studies of level B

3 One study of level B or C

4 Expert opinion

---

**Table S2. Results from meta-analysis of studies assessing the relation between preeclampsia and cardiovascular disease and risk factors**

| <b>Outcome</b> | <b>Number of studies</b> | <b>RR (95% CI)</b>   | <b>I<sup>2</sup></b> | <b>Level of evidence</b> | <b>References</b> |
|----------------|--------------------------|----------------------|----------------------|--------------------------|-------------------|
| Overall CVD    | 8                        | 2.15 (1.76-2.61)*    | 78%                  | 2                        | 3-10              |
| IHD            | 7                        | 2.06 (1.68-2.52)*    | 78%                  | 2                        | 3, 6, 11-15       |
| Stroke         | 4                        | 1.53 (1.21-1.92)*    | 33%                  | 2                        | 3, 5, 7, 9        |
| Hypertension   | 3                        | 2.76 (1.63-4.69)*    | 92%                  | 2                        | 11, 13, 16        |
|                | 16                       | 4.46 (3.14-6.33)**   | 63%                  | 2                        | 17-32             |
| Diabetes       | 6                        | 2.27 (1.55-3.32)*    | 94%                  | 2                        | 13, 16, 33-36     |
| Dyslipidemia   | 4                        | 1.07 (0.74-1.54)**,# | 24%                  | 2                        | 20, 23, 27, 37    |

\* Based on cohort studies (Level B studies)

\*\* Based on case-control studies (Level B studies)

# Combination of studies reporting on preeclampsia and pregnancy induced hypertension

CI, confidence interval; CVD, cardiovascular disease; IHD, ischemic heart disease; RR, relative risk

**Table S3. Results from meta-analysis of studies assessing the relation between gestational hypertension and cardiovascular disease and risk factors**

| <b>Outcome</b> | <b>Number of studies</b> | <b>RR (95% CI)</b>   | <b>I<sup>2</sup></b> | <b>Level of evidence</b> | <b>References</b>     |
|----------------|--------------------------|----------------------|----------------------|--------------------------|-----------------------|
| Overall CVD    | 4                        | 1.89 (1.31-2.72)*    | 88%                  | 2                        | 3, 5, 7, 9            |
| IHD            | 4                        | 1.44 (1.30-1.60)*    | 0%                   | 2                        | 3, 11, 13, 15         |
| Stroke         | 2                        | 1.41 (1.20-1.65)*    | 22%                  | 2                        | 3, 13                 |
| Hypertension   | 3                        | 2.40 (0.97-5.93)*    | 100%                 | 2                        | 3, 11, 13             |
|                | 5                        | 4.35 (2.18-8.70)**   | 79%                  | 2                        | 17, 23, 24, 31, 32    |
| Diabetes       | 8                        | 2.10 (1.45-3.04)*,#  | 96%                  | 2                        | 13, 16, 33-36, 38, 39 |
| Dyslipidemia   | 4                        | 1.07 (0.74-1.54)**,# | 24%                  | 2                        | 20, 23, 27, 37        |

\* Based on cohort studies (Level B studies)

\*\* Based on case-control studies (Level B studies)

# Combination of studies reporting on preeclampsia and pregnancy induced hypertension

CI, confidence interval; CVD, cardiovascular disease; IHD, ischemic heart disease; RR, relative risk

### **Section S3. Summary of the Dutch guideline for cardiovascular management**

For optimal implementation in clinical practice in the Netherlands, this guideline aims to comply with the current Dutch guideline for cardiovascular risk management in the general population, published in 2011.<sup>40</sup> The latter guideline was developed to establish optimal and cost-effective primary and secondary CVD prevention. A short summary is given below.

#### **Identification of high-risk patients**

All patients with manifest CVD are considered as high-risk patients. In patients without previous CVD, it is recommended to obtain a CVD risk profile if one of the following is present:

- 1) Diabetes mellitus, rheumatoid arthritis or chronic kidney disease,
- 2) Family history of premature CVD (<65 year),
- 3) Systolic blood pressure (SBP) > 140 mmHg or antihypertensive therapy,
- 4) Total cholesterol (TC) > 6.5 mmol/L (>250 mg/dL) or statin therapy,
- 5) Smoking and ≥ 50 years of age.

A complete risk profile involves collection of information on:

- 1) Medical history (first-degree relative with CVD <65 years, smoking, nutrition, alcohol intake and physical activity);



2) Physical examination (body mass index (BMI), waist circumference and blood pressure);

3) Laboratory (fasting glucose, TC/ high-density lipoprotein (HDL)-ratio, serum creatinine).

### **Risk assessment**

For individuals free of CVD, the ten-year risk of developing fatal or nonfatal CVD (in percentage) is assessed using the SCORE risk table, based on absolute risks and calibrated for Dutch CVD data.<sup>41</sup>

- Individuals at low risk for fatal or nonfatal CVD (<10%) receive recommendations for lifestyle modifications when necessary. They rarely receive antihypertensive or statin therapy.
- Individuals at intermediate risk (10 to 20%) receive recommendations for lifestyle modifications and antihypertensive (if systolic blood pressure (SBP) > 140 mmHg) and/or statin therapy (when low-density lipoprotein cholesterol (LDL-c) > 2,5 mmol/L) (>97 mg/dL) when at least one additional risk factor is present. Additional risk factors are: 1) family history of premature CVD; 2) obesity (BMI  $\geq$  30 kg/m<sup>2</sup>); 3) physical inactivity (<30 min/day,  $\leq$ 5 day/wk or sedentary living); and 4) impaired renal function (<65 year: 30-60 ml/min/1,73m<sup>2</sup>;  $\geq$ 60 year: 30-45 ml/min/1,73m<sup>2</sup> or <30 ml/min/1,73m<sup>2</sup>).

- Individuals at high risk ( $\geq 20\%$ ) receive recommendations for lifestyle modifications and if necessary antihypertensive (when SBP  $> 140$  mmHg) and statin therapy (when LDL-c  $> 2.5$  mmol/L).

The Dutch guideline for cardiovascular risk management diverges from the recommendations given in the guidelines of both the American College of Cardiology (ACC)/AHA and European Society of Cardiology (ESC). The ACC/AHA guideline on the assessment of cardiovascular risk uses race- and specific Pooled Cohort Equations to predict 10-year risk of a first hard atherosclerotic cardiovascular event.<sup>42</sup> The variables that are included in this risk assessment are: age, TC, high-density lipoprotein cholesterol (HDL-c), SBP (including treated or untreated status), diabetes mellitus, and current smoking status. If an elevated 10-year risk ( $\geq 7.5\%$ ) is found, patients are treated in accordance with the guidelines on blood cholesterol, obesity and lifestyle management.<sup>42</sup> If a low 10-year risk ( $< 7.5\%$ ) is found, it is recommended to assess 30-year lifetime risk in those 20-59 year of age and to refer to the AHA/ACC lifestyle guideline. On the other hand, the ESC guideline on cardiovascular disease prevention in clinical practice uses another SCORE system, which estimates the 10-year risk of a first fatal atherosclerotic event.<sup>43</sup> In general, those with a risk of CVD death of  $\geq 5\%$  qualify for intensive advice, and may benefit from drug treatment. At risk levels  $> 10\%$ , drug treatment is more frequently required. In conclusion, these guidelines use a lower threshold to start treatment among women with an increased risk of CVD. The Dutch Guideline Development Group has adopted a higher threshold for treatment for two main reasons. Firstly, the number of individuals needing treatment would have increased excessively which would have substantial impact on the workload and national health care budget. Secondly, a lower threshold would cause an undesirable large-scale medicalization of a relatively healthy population without symptoms.<sup>44</sup>

## **Nonpharmacological treatment**

Recommendations for lifestyle interventions should be given to all individuals with modifiable risk factors, and comprise of: 1) smoking cessation; 2) increase in physical activity; 3) increase in fruit and vegetable intake, decrease in saturated and total fat intake and reduction of salt intake; 4) moderation of alcohol consumption; 5) weight reduction in the overweight (optimal weight for those aged under 70:  $\text{BMI} \leq 25 \text{ kg/m}^2$ ; above the age of 70 years:  $\text{BMI} \leq 30 \text{ kg/m}^2$ ).<sup>45</sup>

## **Pharmacological treatment**

### *Antihypertensive therapy*

For individuals free of CVD treatment recommendations are based on the estimated ten-year risk of fatal and nonfatal CVD as described above. Individuals with a SBP > 180 mmHg on repeated measurements, and SBP > 160 mmHg below 50 years of age, should be treated with antihypertensive treatment in addition to lifestyle modification, regardless of their ten-year risk of CVD. Despite absence of evidence on the benefits of antihypertensive treatment in young individuals, it is expected that long-term exposure to a high blood pressure is harmful. Although the European Society of Hypertension (ESH), ESC and AHA currently recommends the treatment of a blood pressure  $\geq 140/90$  mmHg in young adults,<sup>46,47</sup> we decided to comply with the current Dutch guideline for cardiovascular risk management to establish uniformity and acceptance in the Netherlands.

### *Lipid lowering therapy*

For individuals free of CVD treatment recommendations for lipid lowering therapy are based on the estimated ten-year risk of fatal and nonfatal CVD as described above.

Regardless of the risk of developing CVD, lipid-lowering drugs are recommended when TC/HDL-ratio > 8. By contrast, the ACC/AHA and ESC recommend treatment with lipid-lowering drugs if LDL-c  $\geq$  4.9 mmol/l (190 mg/dl), but they recommend lower thresholds for treatment in individuals with an increased 10-year risk of CVD<sup>48, 49</sup>

Oppositely, the Dutch guideline uses TC/HDL-ratio instead of TC levels, as the ratio of TC to HDL-c levels is the best lipid-screening test to identify those at high risk for IHD mortality.<sup>50</sup>

**Table S4. Results from meta-analysis of studies assessing the relation between spontaneous preterm delivery and cardiovascular disease and risk factors**

| <b>Outcome</b> | <b>Number of studies</b> | <b>RR (95% CI)</b> | <b>I<sup>2</sup></b> | <b>Level of evidence</b> | <b>References</b> |
|----------------|--------------------------|--------------------|----------------------|--------------------------|-------------------|
| Overall CVD    | 5                        | 2.06 (1.58-2.68)*  | 72%                  | 2                        | 51-55             |
| IHD            | 3                        | 1.38 (1.22-1.57)*  | 74%                  | 2                        | 56-58             |
| Stroke         | 3                        | 1.71 (1.53-1.91)*  | 0%                   | 2                        | 53, 59, 60        |
| Hypertension   | 2                        | 1.29 (1.24-1.35)*  | 90%                  | 2                        | 57, 59            |
| Diabetes       | 2                        | 1.77 (1.46-2.15)*  | 7%                   | 2                        | 57, 59            |
| Dyslipidemia   | 0                        | -                  | -                    | -                        |                   |

\* Based on cohort studies (Level B studies)

CI, confidence interval; CVD, cardiovascular disease; IHD, ischemic heart disease; RR, relative risk

**Table S5. Results from meta-analysis of studies assessing the relation between a history of a small-for-gestational-age infant and cardiovascular disease and risk factors**

| <b>Outcome</b> | <b>Number of studies</b> | <b>RR (95% CI)</b> | <b>I<sup>2</sup></b> | <b>Level of evidence</b> | <b>References</b> |
|----------------|--------------------------|--------------------|----------------------|--------------------------|-------------------|
| Overall CVD    | 4                        | 1.66 (1.26-2.18)*  | 93%                  | 2                        | 54, 61-63         |
| IHD            | 3                        | 1.68 (1.31-2.14)*  | 91%                  | 2                        | 63-65             |
| Stroke         | 2                        | 1.62 (1.51-1.74)*  | 0%                   | 2                        | 65, 66            |
| Hypertension   | 1                        | 1.23 (1.16-1.30)*  | -                    | 3                        | 65                |
| Diabetes       | 1                        | 0.96 (0.86-1.06)*  | -                    | 3                        | 65                |
| Dyslipidemia   | 0                        | -                  | -                    | -                        |                   |

\* Based on cohort studies (Level B studies)

CI, confidence interval; CVD, cardiovascular disease; IHD, ischemic heart disease; RR, relative risk

**Table S6. Results from meta-analysis of studies assessing the relation between a history of recurrent miscarriage and cardiovascular disease and risk factors**

| <b>Outcome</b> | <b>Number of studies</b> | <b>RR (95% CI)</b>  | <b>I<sup>2</sup></b> | <b>Level of evidence</b> | <b>References</b> |
|----------------|--------------------------|---------------------|----------------------|--------------------------|-------------------|
| Overall CVD    | 0                        | -                   | -                    | -                        |                   |
| IHD            | 3                        | 1.99 (0.94-4.19)*   | 54%                  | 2                        | 67-69             |
|                | 2                        | 3.20 (0.24-42.51)** | 85%                  | 2                        | 70, 71            |
| Stroke         | 2                        | 0.98 (0.80-1.21)*   | 0%                   | 2                        | 67, 68            |
| Hypertension   | 0                        | -                   | -                    | -                        |                   |
| Diabetes       | 0                        | -                   | -                    | -                        |                   |
| Dyslipidemia   | 0                        | -                   | -                    | -                        |                   |

\* Based on cohort studies (Level B studies)

\*\* Based on case-control studies (Level B studies)

CI, confidence interval; CVD, cardiovascular disease; IHD, ischemic heart disease; RR, relative risk

**Table S7. Results from meta-analysis of studies assessing the relation between polycystic ovary syndrome and cardiovascular disease and risk factors**

| <b>Outcome</b> | <b>Number of studies</b> | <b>RR (95% CI)</b>    | <b>I<sup>2</sup></b> | <b>Level of evidence</b> | <b>References</b>          |
|----------------|--------------------------|-----------------------|----------------------|--------------------------|----------------------------|
| Overall CVD    | 4                        | 1.38 (1.04-1.83)*     | 30%                  | 2                        | 72-75                      |
| IHD            | 4                        | 1.11 (1.09-1.81)*     | 0%                   | 2                        | 72, 74, 76, 77             |
| Stroke         | 4                        | 1.79 (0.92-3.48)*     | 14%                  | 2                        | 72, 74, 76, 77             |
| Hypertension   | 10                       | 1.26 (1.10-1.43)*, ** | 24%                  | 2                        | 72, 74-82                  |
| Diabetes       | 7                        | 2.53 (1.91-3.35)*, ** | 86%                  | 2                        | 72-74, 77, 78, 81, 83      |
| Dyslipidemia   | 7                        | 1.75 (1.12-2.72)*, ** | 70%                  | 2                        | 74, 75, 77, 78, 81, 82, 84 |

\* Based on cohort studies (Level B studies); \*\* Based on case-control studies (level B studies)

CI, confidence interval; CVD, cardiovascular disease; IHD, ischemic heart disease; RR, relative risk



**Table S8. Results from meta-analysis of studies assessing the relation between premature ovarian insufficiency and cardiovascular disease and risk factors**

| <b>Outcome</b> | <b>Number of studies</b> | <b>RR (95% CI)</b> | <b>I<sup>2</sup></b> | <b>Level of evidence</b> | <b>References</b> |
|----------------|--------------------------|--------------------|----------------------|--------------------------|-------------------|
| Overall CVD    | 2                        | 1.61 (1.22-2.12)*  | 0%                   | 2                        | 85, 86            |
| IHD            | 7                        | 1.69 (1.29-2.21)*  | 22%                  | 1                        | 85-91             |
| Stroke         | 7                        | 1.03 (0.88-1.19)*  | 0%                   | 1                        | 85, 87-89, 92-94  |
| Hypertension   | 1                        | 1.16 (0.68-1.98)*  | -                    | 2                        | 93                |
| Diabetes       | 1                        | 1.32 (0.70-2.49)*  | -                    | 2                        | 93                |
| Dyslipidemia   | 0                        | -                  | -                    | -                        |                   |

\* Based on cohort studies (Level B studies)

CI, confidence interval; CVD, cardiovascular disease; IHD, ischemic heart disease; RR, relative risk

#### **Section S4. Identified knowledge gaps**

The guideline development group acknowledges that more research is needed to support and enhance our recommendations on cardiovascular risk management after reproductive and pregnancy related disorders. Unanswered questions are:

- Accurate estimates of absolute risk of CVD after a reproductive or pregnancy related disorder.
- Studies of the role of PE/PIH as added value in cardiovascular risk prediction models (IPD).
- Cohort studies assessing the relation between the other reproductive and pregnancy related disorders and CVD with adequate measurements of exposure, confounders and events.
- Pathways explaining the relation of reproductive or pregnancy related disorders with CVD.
- Intervention studies aiming to postpone the development of CVD events or risk factor, including cost effectiveness.

**Table S9. Summary of guidelines addressing postpartum CVD prevention after reproductive and pregnancy related disorders**

| <b>Guideline</b>                                                                                  | <b>Reproductive or pregnancy related disorder</b> | <b>Recommendation</b>                                                                                                                                                                                                                      |
|---------------------------------------------------------------------------------------------------|---------------------------------------------------|--------------------------------------------------------------------------------------------------------------------------------------------------------------------------------------------------------------------------------------------|
| <b>ESC Guidelines on the management of cardiovascular diseases during pregnancy</b> <sup>95</sup> | Hypertensive disorders of pregnancy               | Lifestyle modifications, regular blood pressure control, and control of metabolic factors are recommended after delivery.                                                                                                                  |
| <b>ESH/ESC Guidelines for the management of arterial hypertension</b> <sup>46</sup>               | Hypertensive disorders of pregnancy               | Lifestyle modifications and regular check-ups of blood pressure and metabolic factors are recommended after delivery.                                                                                                                      |
| <b>AHA Guidelines for the Prevention of Stroke in Women</b> <sup>96</sup>                         | Preeclampsia                                      | Consider evaluating all women starting 6 months to 1 year post partum, as well as those who are past childbearing age, and document their history of preeclampsia/eclampsia as a risk factor.<br><br>Evaluate and treat for cardiovascular |

risk factors including hypertension, obesity, smoking, and dyslipidemia.

|                                                                                                                                |                                                                         |                                                                                                                                                                                                            |
|--------------------------------------------------------------------------------------------------------------------------------|-------------------------------------------------------------------------|------------------------------------------------------------------------------------------------------------------------------------------------------------------------------------------------------------|
| <b>AHA Effectiveness-<br/>Based Guidelines for<br/>the Prevention of<br/>Cardiovascular Disease<br/>in Women</b> <sup>97</sup> | Preeclampsia, gestational diabetes, and pregnancy-induced hypertension. | Appropriate referral postpartum by the obstetrician to a primary care physician or cardiologist should occur so that in the years after pregnancy, risk factors can be carefully monitored and controlled. |
|--------------------------------------------------------------------------------------------------------------------------------|-------------------------------------------------------------------------|------------------------------------------------------------------------------------------------------------------------------------------------------------------------------------------------------------|

Healthcare professionals who meet women for the first time later in their lives should take a careful and detailed history of pregnancy complications with focused questions about a history of gestational diabetes mellitus, preeclampsia, preterm birth, or birth of an infant small for gestational age.

Evaluation of CVD risk factors, and provide lifestyle recommendations; blood pressure control and LDL-C lowering therapy if LDL-C  $\geq$ 190 mg/dl

---

AHA, American Heart Association; CVD, cardiovascular disease; ESC, European Society of Cardiology; ESH, European Society of Hypertension; LDL-C, low-density-lipoprotein cholesterol

## References

1. AGREE Collaboration. Development and validation of an international appraisal instrument for assessing the quality of clinical practice guidelines: The AGREE project. *Qual Saf Health Care*. 2003;12:18-23.
2. Cochrane. Checklists from the Dutch Cochrane Center. Available at: <http://dcc.cochrane.org/beoordelingsformulieren-en-andere-downloads>.
3. Bhattacharya S, Prescott GJ, Iversen L, et al. Hypertensive disorders of pregnancy and future health and mortality: A record linkage study. *Pregnancy hypertension*. 2012;2:1-7.
4. Funai EF, Friedlander Y, Paltiel O, et al. Long-term mortality after preeclampsia. *Epidemiology*. 2005;16:206-215.
5. Kestenbaum B, Seliger SL, Easterling TR, et al. Cardiovascular and thromboembolic events following hypertensive pregnancy. *Am J Kidney Dis*. 2003;42:982-989.
6. Lin YS, Tang CH, Yang CY, et al. Effect of pre-eclampsia-eclampsia on major cardiovascular events among peripartum women in taiwan. *Am J Cardiol*. 2011;107:325-330.
7. Lykke JA, Langhoff-Roos J, Lockwood CJ, et al. Mortality of mothers from cardiovascular and non-cardiovascular causes following pregnancy complications in first delivery. *Paediatr Perinat Epidemiol*. 2010;24:323-330.
8. Mongraw-Chaffin ML, Cirillo PM, Cohn BA. Preeclampsia and cardiovascular disease death: Prospective evidence from the child health and development studies cohort. *Hypertension*. 2010;56:166-171.

9. Ray JG, Vermeulen MJ, Schull MJ, et al. Cardiovascular health after maternal placental syndromes (CHAMPS): Population-based retrospective cohort study. *Lancet*. 2005;366:1797-1803.
10. Skjaerven R, Wilcox AJ, Klungsoyr K, et al. Cardiovascular mortality after pre-eclampsia in one child mothers: Prospective, population based cohort study. *BMJ*. 2012;345:e7677.
11. Haukkamaa L, Moilanen L, Kattainen A, et al. Pre-eclampsia is a risk factor of carotid artery atherosclerosis. *Cerebrovasc Dis*. 2009;27:599-607.
12. Irgens HU, Reisaeter L, Irgens LM, et al. Long term mortality of mothers and fathers after pre-eclampsia: Population based cohort study. *BMJ*. 2001;323:1213-1217.
13. Lykke JA, Langhoff-Roos J, Sibai BM, et al. Hypertensive pregnancy disorders and subsequent cardiovascular morbidity and type 2 diabetes mellitus in the mother. *Hypertension*. 2009;53:944-951.
14. Smith GC, Pell JP, Walsh D. Pregnancy complications and maternal risk of ischaemic heart disease: A retrospective cohort study of 129,290 births. *Lancet*. 2001;357:2002-2006.
15. Wikstrom AK, Haglund B, Olovsson M, et al. The risk of maternal ischaemic heart disease after gestational hypertensive disease. *BJOG*. 2005;112:1486-1491.
16. Magnussen EB, Vatten LJ, Smith GD, et al. Hypertensive disorders in pregnancy and subsequently measured cardiovascular risk factors. *Obstet Gynecol*. 2009;114:961-970.
17. Adams EM, Macgillivray I. Long-term effect of preeclampsia on blood-pressure. *Lancet*. 1961;2:1373-1375.

18. Berends AL, de Groot CJ, Sijbrands EJ, et al. Shared constitutional risks for maternal vascular-related pregnancy complications and future cardiovascular disease. *Hypertension*. 2008;51:1034-1041.
19. Canti IC, Komlos M, Martins-Costa SH, et al. Risk factors for cardiovascular disease ten years after preeclampsia. *Sao Paulo Med J*. 2010;128:10-13.
20. Drost JT, Arpaci G, Ottervanger JP, et al. Cardiovascular risk factors in women 10 years post early preeclampsia: The preeclampsia risk Evaluation in FEMales study (PREVFEM). *Eur J Prev Cardiol*. 2012;19:1138-1144.
21. Epstein FH. Late vascular effects of toxemia of pregnancy. *N Engl J Med*. 1964;271:391-395.
22. Gaugler-Senden IP, Berends AL, de Groot CJ, et al. Severe, very early onset preeclampsia: Subsequent pregnancies and future parental cardiovascular health. *Eur J Obstet Gynecol Reprod Biol*. 2008;140:171-177.
23. Marin R, Gorostidi M, Portal CG, et al. Long-term prognosis of hypertension in pregnancy. *Hypertens Pregnancy*. 2000;19:199-209.
24. Nisell H, Lintu H, Lunell NO, et al. Blood pressure and renal function seven years after pregnancy complicated by hypertension. *Br J Obstet Gynaecol*. 1995;102:876-881.
25. North RA, Simmons D, Barnfather D, et al. What happens to women with preeclampsia? microalbuminuria and hypertension following preeclampsia. *Aust N Z J Obstet Gynaecol*. 1996;36:233-238.
26. Portelinha A, Belo L, Cerdeira AS, et al. Lipid levels including oxidized LDL in women with history of preeclampsia. *Hypertens Pregnancy*. 2010;29:93-100.

27. Sattar N, Ramsay J, Crawford L, et al. Classic and novel risk factor parameters in women with a history of preeclampsia. *Hypertension*. 2003;42:39-42.
28. Shahbazian N, Shahbazian H, Ehsanpour A, et al. Hypertension and microalbuminuria 5 years after pregnancies complicated by pre-eclampsia. *Iran J Kidney Dis*. 2011;5:324-327.
29. Sibai BM, el-Nazer A, Gonzalez-Ruiz A. Severe preeclampsia-eclampsia in young primigravid women: Subsequent pregnancy outcome and remote prognosis. *Am J Obstet Gynecol*. 1986;155:1011-1016.
30. Spaan JJ, Ekhart T, Spaanderman ME, et al. Remote hemodynamics and renal function in formerly preeclamptic women. *Obstet Gynecol*. 2009;113:853-859.
31. Svensson A, Andersch B, Hansson L. A clinical follow-up study of 260 women with hypertension in pregnancy. *Clin Exp Hypertens B*. 1983;2:95-102.
32. Wilson BJ, Watson MS, Prescott GJ, et al. Hypertensive diseases of pregnancy and risk of hypertension and stroke in later life: Results from cohort study. *BMJ*. 2003;326:845.
33. Callaway LK, Lawlor DA, O'Callaghan M, et al. Diabetes mellitus in the 21 years after a pregnancy that was complicated by hypertension: Findings from a prospective cohort study. *Am J Obstet Gynecol*. 2007;197:492.e1-492.e7.
34. Carr DB, Newton KM, Utzschneider KM, et al. Preeclampsia and risk of developing subsequent diabetes. *Hypertens Pregnancy*. 2009;28:435-447.
35. Engeland A, Bjorge T, Daltveit AK, et al. Risk of diabetes after gestational diabetes and preeclampsia. A registry-based study of 230,000 women in Norway. *Eur J Epidemiol*. 2011;26:157-163.



36. Libby G, Murphy DJ, McEwan NF, et al. Pre-eclampsia and the later development of type 2 diabetes in mothers and their children: An intergenerational study from the walker cohort. *Diabetologia*. 2007;50:523-530.
37. Edlow AG, Srinivas SK, Elovitz MA. Investigating the risk of hypertension shortly after pregnancies complicated by preeclampsia. *Am J Obstet Gynecol*. 2009;200:e60-2.
38. Cassidy A, Chiuve SE, Manson JE, et al. Potential role for plasma placental growth factor in predicting coronary heart disease risk in women. *Arterioscler Thromb Vasc Biol*. 2009;29:134-139.
39. Garovic VD, Bailey KR, Boerwinkle E, et al. Hypertension in pregnancy as a risk factor for cardiovascular disease later in life. *J Hypertens*. 2010;28:826-833.
40. Wiersma T, Smulders YM, Stehouwer CD, et al. Summary of the multidisciplinary guideline on cardiovascular risk management (revision 2011). *Ned Tijdschr Geneesk*. 2012;156:A5104.
41. Conroy RM, Pyorala K, Fitzgerald AP, et al. Estimation of ten-year risk of fatal cardiovascular disease in europe: The SCORE project. *Eur Heart J*. 2003;24:987-1003.
42. Goff DC, Jr, Lloyd-Jones DM, Bennett G, et al. 2013 ACC/AHA guideline on the assessment of cardiovascular risk: A report of the american college of Cardiology/American heart association task force on practice guidelines. *Circulation*. 2014;129:S49-73.
43. Perk J, De Backer G, Gohlke H, et al European guidelines on cardiovascular disease prevention in clinical practice (version 2012). the fifth joint task force of the european society of cardiology and other societies on cardiovascular disease prevention in clinical

practice (constituted by representatives of nine societies and by invited experts). *Eur Heart J*. 2012;33:1635-1701.

44. Getz L, Sigurdsson JA, Hetlevik I, et al. Estimating the high risk group for cardiovascular disease in the norwegian HUNT 2 population according to the 2003 european guidelines: Modelling study. *BMJ*. 2005;331:551.

45. Dickinson HO, Mason JM, Nicolson DJ, et al. Lifestyle interventions to reduce raised blood pressure: A systematic review of randomized controlled trials. *J Hypertens*. 2006;24:215-233.

46. Mancia G, Fagard R, Narkiewicz K, et al. 2013 ESH/ESC guidelines for the management of arterial hypertension: The task force for the management of arterial hypertension of the european society of hypertension (ESH) and of the european society of cardiology (ESC). *Eur Heart J*. 2013;34:2159-2219.

47. Rosendorff C, Black HR, Cannon CP, et al. Treatment of hypertension in the prevention and management of ischemic heart disease: A scientific statement from the american heart association council for high blood pressure research and the councils on clinical cardiology and epidemiology and prevention. *Circulation*. 2007;115:2761-2788.

48. Reiner Z, Catapano AL, De Backer G, et al. ESC/EAS guidelines for the management of dyslipidaemias: The task force for the management of dyslipidaemias of the european society of cardiology (ESC) and the european atherosclerosis society (EAS). *Eur Heart J*. 2011;32:1769-1818.

49. Stone NJ, Robinson JG, Lichtenstein AH, et al. 2013 ACC/AHA guideline on the treatment of blood cholesterol to reduce atherosclerotic cardiovascular risk in adults: A

report of the american college of Cardiology/American heart association task force on practice guidelines. *Circulation*. 2014;129:S1-45.

50. Grover SA, Palmer CS, Coupal L. Serum lipid screening to identify high-risk individuals for coronary death. the results of the lipid research clinics prevalence cohort. *Arch Intern Med*. 1994;154:679-684.

51. Bonamy AK, Parikh NI, Cnattingius S, et al. Birth characteristics and subsequent risks of maternal cardiovascular disease: Effects of gestational age and fetal growth. *Circulation*. 2011;124:2839-2846.

52. Catov JM, Newman AB, Roberts JM, et al. Preterm delivery and later maternal cardiovascular disease risk. *Epidemiology*. 2007;18:733-739.

53. Irgens HU, Reisaeter L, Irgens LM, et al. Long term mortality of mothers and fathers after pre-eclampsia: Population based cohort study. *BMJ*. 2001;323:1213-1217.

54. Lykke JA, Langhoff-Roos J, Lockwood CJ, et al. Mortality of mothers from cardiovascular and non-cardiovascular causes following pregnancy complications in first delivery. *Paediatr Perinat Epidemiol*. 2010;24:323-330.

55. Smith GD, Whitley E, Gissler M, et al. Birth dimensions of offspring, premature birth, and the mortality of mothers. *Lancet*. 2000;356:2066-2067.

56. Hastie CE, Smith GC, Mackay DF, et al. Maternal risk of ischaemic heart disease following elective and spontaneous pre-term delivery: Retrospective cohort study of 750 350 singleton pregnancies. *Int J Epidemiol*. 2011;40:914-919.

57. Lykke JA, Paidas MJ, Damm P, et al. Preterm delivery and risk of subsequent cardiovascular morbidity and type-II diabetes in the mother. *BJOG*. 2010;117:274-281.

58. Wikstrom AK, Haglund B, Olovsson M, et al. The risk of maternal ischaemic heart disease after gestational hypertensive disease. *BJOG*. 2005;112:1486-1491.
59. Catov JM, Wu CS, Olsen J, et al. Early or recurrent preterm birth and maternal cardiovascular disease risk. *Ann Epidemiol*. 2010;20:604-609.
60. Pell JP, Smith GC, Walsh D. Pregnancy complications and subsequent maternal cerebrovascular events: A retrospective cohort study of 119,668 births. *Am J Epidemiol*. 2004;159:336-342.
61. Li CY, Chen HF, Sung FC, et al. Offspring birth weight and parental cardiovascular mortality. *Int J Epidemiol*. 2010;39:1082-1090.
62. Mongraw-Chaffin ML, Cirillo PM, Cohn BA. Preeclampsia and cardiovascular disease death: Prospective evidence from the child health and development studies cohort. *Hypertension*. 2010;56:166-171.
63. Nilsson PM, Li X, Sundquist J, et al. Maternal cardiovascular disease risk in relation to the number of offspring born small for gestational age: National, multi-generational study of 2.7 million births. *Acta Paediatr*. 2009;98:985-989.
64. Bukowski R, Davis KE, Wilson PW. Delivery of a small for gestational age infant and greater maternal risk of ischemic heart disease. *PLoS One*. 2012;7:e33047.
65. Lykke JA, Paidas MJ, Triche EW et al. Fetal growth and later maternal death, cardiovascular disease and diabetes. *Acta Obstet Gynecol Scand*. 2012;91:503-510.
66. Bonamy AK, Parikh NI, Cnattingius S, et al. Birth characteristics and subsequent risks of maternal cardiovascular disease: Effects of gestational age and fetal growth. *Circulation*. 2011;124:2839-2846.

67. Gallagher LG, Davis LB, Ray RM, et al. Reproductive history and mortality from cardiovascular disease among women textile workers in shanghai, china. *Int J Epidemiol.* 2011;40:1510-1518.
68. Kharazmi E, Dossus L, Rohrmann S, et al. Pregnancy loss and risk of cardiovascular disease: A prospective population-based cohort study (EPIC-heidelberg). *Heart.* 2011;97:49-54.
69. Smith GC, Pell JP, Walsh D. Spontaneous loss of early pregnancy and risk of ischaemic heart disease in later life: Retrospective cohort study. *BMJ.* 2003;326:423-424.
70. Winkelstein W,Jr, ReKate AC. Age trend of mortality from coronary artery disease in women and observations on the reproductive patterns of those affected. *Am Heart J.* 1964;67:481-488.
71. Bertuccio P, Tavani A, Gallus S, et al. Menstrual and reproductive factors and risk of non-fatal acute myocardial infarction in italy. *Eur J Obstet Gynecol Reprod Biol.* 2007;134:67-72.
72. Iftikhar S, Collazo-Clavell ML, Roger VL, et al. Risk of cardiovascular events in patients with polycystic ovary syndrome. *Neth J Med.* 2012;70:74-80.
73. Morgan CL, Jenkins-Jones S, Currie CJ, et al. Evaluation of adverse outcome in young women with polycystic ovary syndrome versus matched, reference controls: A retrospective, observational study. *J Clin Endocrinol Metab.* 2012;97:3251-3260.
74. Schmidt J, Landin-Wilhelmsen K, Brannstrom M, et al. Cardiovascular disease and risk factors in PCOS women of postmenopausal age: A 21-year controlled follow-up study. *J Clin Endocrinol Metab.* 2011;96:3794-3803.

75. Shaw LJ, Bairey Merz CN, Azziz R, et al. Postmenopausal women with a history of irregular menses and elevated androgen measurements at high risk for worsening cardiovascular event-free survival: Results from the national institutes of health--national heart, lung, and blood institute sponsored women's ischemia syndrome evaluation. *J Clin Endocrinol Metab.* 2008;93:1276-1284.
76. Lunde O, Tanbo T. Polycystic ovary syndrome: A follow-up study on diabetes mellitus, cardiovascular disease and malignancy 15-25 years after ovarian wedge resection. *Gynecol Endocrinol.* 2007;23:704-709.
77. Wild S, Pierpoint T, McKeigue P, et al. Cardiovascular disease in women with polycystic ovary syndrome at long-term follow-up: A retrospective cohort study. *Clin Endocrinol (Oxf).* 2000;52:595-600.
78. Wang ET, Calderon-Margalit R, Cedars MI, et al. Polycystic ovary syndrome and risk for long-term diabetes and dyslipidemia. *Obstet Gynecol.* 2011;117:6-13.
79. Cibula D, Cifkova R, Fanta M, et al. Increased risk of non-insulin dependent diabetes mellitus, arterial hypertension and coronary artery disease in perimenopausal women with a history of the polycystic ovary syndrome. *Hum Reprod.* 2000;15:785-789.
80. Gateva A, Kamenov Z. Cardiovascular risk factors in bulgarian patients with polycystic ovary syndrome and/or obesity. *Obstet Gynecol Int.* 2012;2012:306347.
81. Liang SJ, Liou TH, Lin HW, et al. Obesity is the predominant predictor of impaired glucose tolerance and metabolic disturbance in polycystic ovary syndrome. *Acta Obstet Gynecol Scand.* 2012;91:1167-1172.

82. Wiltgen D, Spritzer PM. Variation in metabolic and cardiovascular risk in women with different polycystic ovary syndrome phenotypes. *Fertil Steril*. 2010;94:2493-2496.
83. Moran LJ, Misso ML, Wild RA, et al. Impaired glucose tolerance, type 2 diabetes and metabolic syndrome in polycystic ovary syndrome: A systematic review and meta-analysis. *Hum Reprod Update*. 2010;16:347-363.
84. Hudecova M, Holte J, Olovsson M, et al. Prevalence of the metabolic syndrome in women with a previous diagnosis of polycystic ovary syndrome: Long-term follow-up. *Fertil Steril*. 2011;96:1271-1274.
85. Hong JS, Yi SW, Kang HC, et al. Age at menopause and cause-specific mortality in south korean women: Kangwha cohort study. *Maturitas*. 2007;56:411-419.
86. van der Schouw YT, van der Graaf Y, Steyerberg EW, et al. Age at menopause as a risk factor for cardiovascular mortality. *Lancet*. 1996;347:714-718.
87. Cooper GS, Sandler DP. Age at natural menopause and mortality. *Ann Epidemiol*. 1998;8:229-235.
88. Gallagher LG, Davis LB, Ray RM, et al. Reproductive history and mortality from cardiovascular disease among women textile workers in shanghai, china. *Int J Epidemiol*. 2011;40:1510-1518.
89. Hu FB, Grodstein F, Hennekens CH, et al. Age at natural menopause and risk of cardiovascular disease. *Arch Intern Med*. 1999;159:1061-1066.
90. Jacobsen BK, Knutsen SF, Fraser GE. Age at natural menopause and total mortality and mortality from ischemic heart disease: The adventist health study. *J Clin Epidemiol*. 1999;52:303-307.

91. Lokkegaard E, Jovanovic Z, Heitmann BL, et al. The association between early menopause and risk of ischaemic heart disease: Influence of hormone therapy. *Maturitas*. 2006;53:226-233.
92. Baba Y, Ishikawa S, Amagi Y, et al. Premature menopause is associated with increased risk of cerebral infarction in Japanese women. *Menopause*. 2010;17:506-510.
93. Choi SH, Lee SM, Kim Y, et al. Natural menopause and risk of stroke in elderly women. *J Korean Med Sci*. 2005;20:1053-1058.
94. Jacobsen BK, Heuch I, Kvale G. Age at natural menopause and stroke mortality: Cohort study with 3561 stroke deaths during 37-year follow-up. *Stroke*. 2004;35:1548-1551.
95. Regitz-Zagrosek V, Blomstrom Lundqvist C, Borghi C, et al. ESC guidelines on the management of cardiovascular diseases during pregnancy: The task force on the management of cardiovascular diseases during pregnancy of the European Society of Cardiology (ESC). *Eur Heart J*. 2011;32:3147-3197.
96. Bushnell C, McCullough LD, Awad IA, et al. Guidelines for the prevention of stroke in women: A statement for healthcare professionals from the American Heart Association/American Stroke Association. *Stroke*. 2014;45:1545-1588.
97. Mosca L, Benjamin EJ, Berra K, et al. Effectiveness-based guidelines for the prevention of cardiovascular disease in women--2011 update: A guideline from the American Heart Association. *Circulation*. 2011;123:1243-1262.
